# Supplementary material
Source: MDPI journal article supplement (https://www.mdpi.com/2073-4344/12/12/1550)
Supplement: s1 [file s1]

## Supplementary Materials

### **Tunable Production of Diesel Bio-blendstock by Rhenium-catalyzed Hydrogenation of Crude Hexanoic Acid from Grape Pomace Fermentation**

Domenico Licursi <sup>1</sup>, Anna Maria Raspolli Galletti <sup>1,\*</sup>, Claudia Antonetti <sup>1</sup>, Gonzalo A. Martinez <sup>2</sup>, Emma Jones <sup>2</sup>, Lorenzo Bertin <sup>2</sup>, Nicola Di Fidio <sup>1</sup>, Sara Fulignati <sup>1</sup>, Gianluca Pasini <sup>3</sup> and Stefano Frigo <sup>3</sup>

<sup>1</sup> Department of Chemistry and Industrial Chemistry, University of Pisa, Via Giuseppe Moruzzi 13, 56124, Pisa, Italy;

<sup>2</sup> Department of Civil, Chemical, Environmental and Materials Engineering (DICAM), University of Bologna, via Terracini 28, 40131, Bologna, Italy;

<sup>3</sup> Department of Energy, System, Territory and Construction Engineering (DESTEC), University of Pisa, Largo Lucio Lazzarino, 56122, Pisa, Italy;

\* Correspondence: [anna.maria.raspolli.galletti@unipi.it](mailto:anna.maria.raspolli.galletti@unipi.it), Phone: +39 050 2219 290

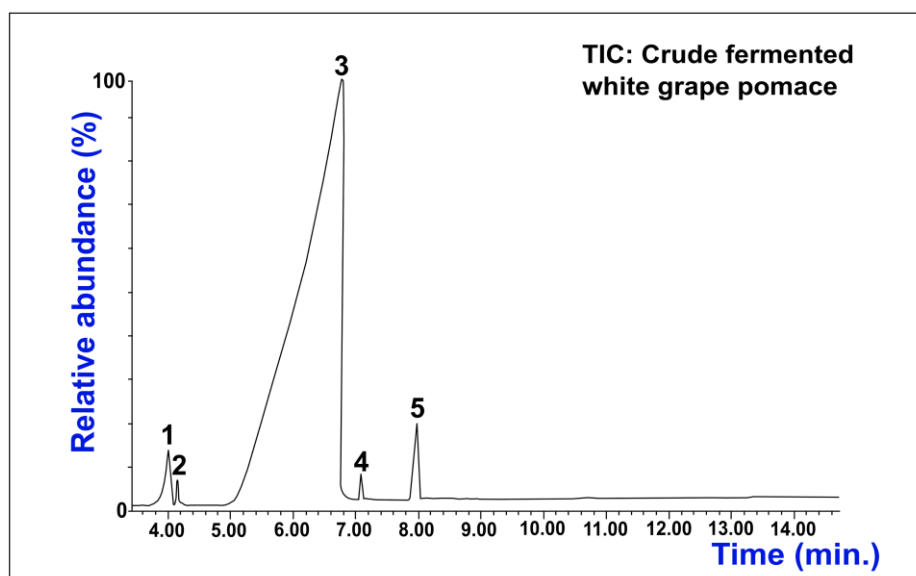

Figure S1. Total ion chromatogram (TIC) of crude fermented white grape pomace.

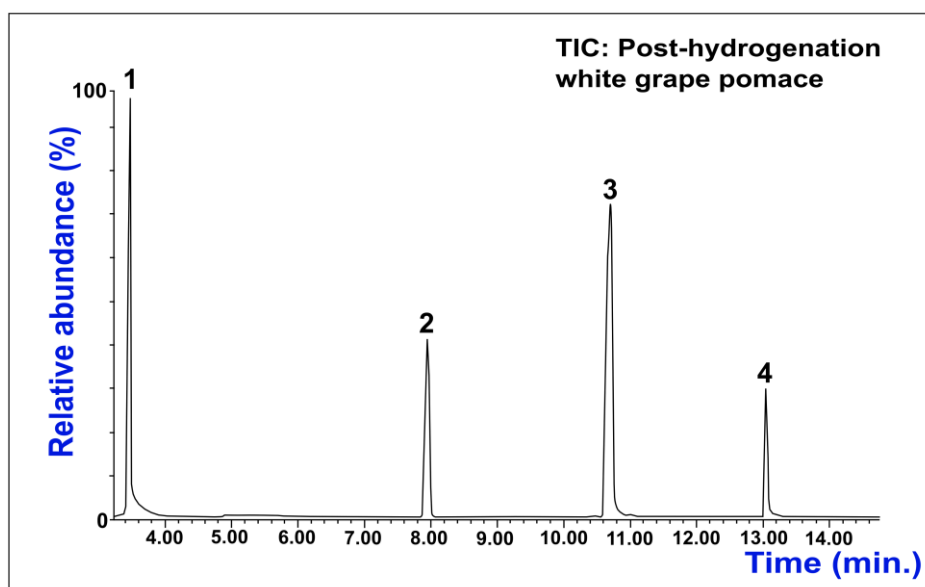

Figure S2. Total ion chromatogram (TIC) of post-hydrogenated white grape pomace.

**Table S1.** Products identified in the crude fermented white grape pomace.

| # | Name           | Retention time (min) | <i>m/z</i>                                        |
|---|----------------|----------------------|---------------------------------------------------|
| 1 | Butanoic acid  | 3.771                | <b>88</b> , 73, 60, 41, 27                        |
| 2 | Pentanoic acid | 4.050                | <b>102</b> , 87, 73, 60, 41, 27                   |
| 3 | Hexanoic acid  | 6.360                | <b>116</b> , 99, 87, 73, 60, 41, 27               |
| 4 | Heptanoic acid | 7.099                | <b>130</b> , 101, 87, 73, 60, 55, 41, 27          |
| 5 | Octanoic acid  | 7.991                | <b>144</b> , 115, 101, 85, 73, 60, 55, 43, 41, 27 |

**Table S2.** Products identified in the crude fermented white grape pomace.

| # | Name            | Retention time (min) | <i>m/z</i>                                                   |
|---|-----------------|----------------------|--------------------------------------------------------------|
| 1 | 1-Hexanol       | 3.466                | <b>102</b> , 84, 69, 56, 43, 31                              |
| 2 | Butyl butanoate | 7.959                | <b>144</b> , 117, 101, 89, 71, 56, 41, 29                    |
| 3 | Hexyl hexanoate | 10.724               | <b>200</b> , 157, 117, 99, 84, 71, 56, 43, 29                |
| 4 | Hexyl octanoate | 13.052               | <b>228</b> , 185, 145, 127, 115, 101, 84, 73, 69, 57, 43, 29 |
